# Supplementary material
Source: PubMed Central journal article supplement (PMC3033570)
Supplement: NIHMS207522-supplement-Supplement.pdf [file NIHMS207522-supplement-Supplement.pdf]

**Online Supplemental Table 1.** Age and sex-adjusted Pearson correlation coefficients for slice-specific adipose tissue measures and insulin measures.

|                                | N   | Correlation Coefficient ( $\rho$ )* |                |                                  |             |
|--------------------------------|-----|-------------------------------------|----------------|----------------------------------|-------------|
|                                |     | Log Insulin                         | Log Proinsulin | Log Proinsulin/<br>insulin ratio | Log HOMA-IR |
| SAT volume                     | 161 | 0.45                                | 0.41           | 0.24                             | 0.46        |
| L <sub>1/2</sub>               | 50  | 0.31                                | 0.46           | 0.34                             | 0.33        |
| L <sub>2/3</sub>               | 161 | 0.45                                | 0.37           | 0.20                             | 0.45        |
| L <sub>3/4</sub>               | 161 | 0.44                                | 0.39           | 0.23                             | 0.44        |
| Umbilicus                      | 161 | 0.42                                | 0.41           | 0.27                             | 0.42        |
| L <sub>4/5</sub>               | 161 | 0.46                                | 0.43           | 0.26                             | 0.48        |
| Iliac crest                    | 161 | 0.46                                | 0.42           | 0.26                             | 0.47        |
| L <sub>5</sub> /S <sub>1</sub> | 161 | 0.46                                | 0.44           | 0.27                             | 0.47        |
| VAT volume                     | 161 | 0.48                                | 0.44           | 0.26                             | 0.48        |
| L <sub>1/2</sub>               | 50  | 0.37                                | 0.52           | 0.39                             | 0.39        |
| L <sub>2/3</sub>               | 161 | 0.51                                | 0.48           | 0.29                             | 0.52        |
| L <sub>3/4</sub>               | 161 | 0.47                                | 0.44           | 0.26                             | 0.48        |
| Umbilicus                      | 161 | 0.43                                | 0.43           | 0.27                             | 0.44        |
| L <sub>4/5</sub>               | 161 | 0.41                                | 0.41           | 0.26                             | 0.42        |
| Iliac crest                    | 161 | 0.37                                | 0.40           | 0.26                             | 0.39        |
| L <sub>5</sub> /S <sub>1</sub> | 161 | 0.40                                | 0.39           | 0.24                             | 0.42        |

Abbreviations: SAT, abdominal subcutaneous adipose tissue; VAT, visceral adipose tissue, HOMA-IR, homeostasis model assessment of insulin resistance

\*P<0.05 for all correlation coefficients
